# Supplementary material
Source: publisher figshare collection journal article supplement (https://gsapubs.figshare.com/ndownloader/files/23314877)
Supplement: Supplementary file 1 [file 23314877]

## Sheet: mineral EMPA data
TABLE DR3. RESULTS OF MINERAL EMPA DATA
Orthopyroxene
Spot no.*	17.1	17.2	17.3	17.4	17.5	17.6	17.7	17.8	17.9	17.1	59.1	59.2	59.3	59.4	61.1	61.2	61.3	61.4	61.5	89.1	89.2	89.3	90.1
Generation†	p	p	p	p	p	p	p	p	p	p	p	p	p	p	p	p	p	p	p	p	p	p	p
SiO2	51.905	52.052	52.048	51.94	51.697	52.908	53.371	52.845	52.25	53.412	50.031	50.293	52.538	52.57	52.066	52.148	50.809	51.996	49.519	51.517	52.142	52.696	52.812
TiO2	0.086	0.091	0.134	0.114	0.112	0.025	0.046	0.074	0.017	0.033	0.056	0.066	0.037	0.101	0.073	0.058	0.108	0.066	0.129	0.09	0.058	0.07	0.101
Al2O3	0.915	0.943	1.067	1.209	0.952	0.711	0.833	0.958	0.927	1.161	1.14	1.285	1.093	0.961	1.322	0.928	1.048	0.912	0.894	1.107	1.138	1.143	0.984
Cr2O3	0.012	0.006	0.058	0.071	0.046	0.055	0.071	0.052	0.035	0.046	N.D.§	0.032	0.015	0	0.028	0	0.014	0.002	0.041	0.01	0	0.004	0
FeO	25.256	24.62	24.209	24.336	24.546	24.135	22.673	23.171	22.732	23.245	24.792	25.877	24.776	24.819	26.411	26.326	25.84	24.846	25.79	25.418	25.602	24.176	25.559
MnO	0.709	0.661	0.664	0.647	0.728	0.81	0.714	0.681	0.697	0.727	0.698	0.728	0.654	0.675	0.693	0.731	0.753	0.68	0.7	0.827	0.96	0.935	0.748
MgO	21.59	22.043	21.653	21.205	21.23	20.497	21.536	21.195	20.443	21.293	19.667	18.845	20.127	20.44	20.776	20.712	19.86	19.922	19.066	21.072	20.774	20.172	20.969
CaO	0.469	0.362	0.41	0.616	0.495	0.63	0.439	0.565	0.482	0.532	0.92	0.794	0.56	0.542	0.575	0.588	0.536	0.547	0.57	0.542	0.53	0.505	0.599
Na2O	0.062	0.081	0.012	0.043	0.086	0.049	0.029	0.061	0.09	0.059	0.12	0.246	0	0	0	0.075	0.033	0.035	0.092	0	0.031	0.02	0.014
K2O	0.009	0.016	0.001	0.008	0.003	0.018	0.012	0.003	0.028	0.005	0.028	0.07	0	0	0.008	0.01	0.015	0	0.023	0.012	0.007	0	0.012
Total	101.013	100.875	100.256	100.189	99.895	99.838	99.724	99.605	97.701	100.513	97.452	98.236	99.8	100.108	101.952	101.576	99.016	99.006	96.824	100.595	101.242	99.721	101.798
Oxygens	6	6	6	6	6	6	6	6	6	6	6	6	6	6	6	6	6	6	6	6	6	6	6
Si	1.93	1.931	1.946	1.946	1.943	1.992	1.995	1.985	1.998	1.985	1.937	1.941	1.983	1.979	1.929	1.939	1.942	1.982	1.94	1.928	1.943	1.987	1.956
Ti	0.003	0.003	0.004	0.003	0.003	0.001	0.001	0.002	0.001	0.001	0.002	0.002	0.001	0.003	0.002	0.002	0.003	0.002	0.004	0.003	0.002	0.002	0.003
Al	0.04	0.041	0.047	0.053	0.042	0.032	0.037	0.042	0.042	0.051	0.052	0.058	0.049	0.043	0.058	0.041	0.047	0.041	0.041	0.049	0.05	0.051	0.043
Cr	0	0	0.002	0.002	0.001	0.002	0.002	0.001	0.001	0.001	0	0.001	0	0	0.001	0	0	0	0.001	0	0	0	0
Fe3+	0.1	0.097	0.052	0.05	0.071	0	0	0	0	0	0.081	0.077	0	0	0.08	0.084	0.065	0	0.078	0.089	0.064	0	0.041
Fe2+	0.685	0.667	0.705	0.712	0.7	0.76	0.709	0.728	0.727	0.723	0.722	0.759	0.782	0.781	0.739	0.735	0.761	0.792	0.767	0.706	0.734	0.762	0.751
Mn	0.022	0.021	0.021	0.021	0.023	0.026	0.022	0.022	0.023	0.023	0.023	0.024	0.021	0.022	0.022	0.023	0.024	0.022	0.023	0.026	0.03	0.03	0.023
Mg	1.196	1.219	1.206	1.184	1.189	1.15	1.2	1.186	1.165	1.18	1.135	1.084	1.132	1.147	1.147	1.148	1.131	1.132	1.113	1.176	1.154	1.133	1.158
Ca	0.019	0.014	0.016	0.025	0.02	0.025	0.018	0.023	0.02	0.021	0.038	0.033	0.023	0.022	0.023	0.023	0.022	0.022	0.024	0.022	0.021	0.02	0.024
Na	0.004	0.006	0.001	0.003	0.007	0.004	0.002	0.004	0.007	0.004	0.009	0.018	0	0	0	0.005	0.002	0.003	0.007	0	0.002	0.001	0.001
K	0	0.001	0	0	0	0.001	0	0	0.001	0	0.001	0.003	0	0	0	0	0.001	0	0.001	0.001	0	0	0.001
Sum	4	4	4	4	4	3.993	3.986	3.994	3.984	3.99	4	4	3.991	3.997	4	4	4	3.996	4	4	4	3.987	4
Wo	0.925	0.709	0.821	1.249	1.004	1.295	0.904	1.171	1.017	1.084	1.909	1.653	1.156	1.105	1.145	1.168	1.103	1.141	1.193	1.072	1.056	1.058	1.192
En	59.148	60.408	60.305	59.446	59.341	58.647	61.583	60.582	60.235	60.606	56.791	54.875	57.84	58.171	57.081	57.022	56.469	57.502	55.525	58.221	57.602	58.236	57.982
Fs	39.927	38.883	38.875	39.305	39.655	40.058	37.513	38.248	38.749	38.31	41.3	43.472	41.004	40.725	41.774	41.811	42.428	41.357	43.283	40.707	41.341	40.706	40.825
Clinopyroxene
Spot no.	17.1	17.2	17.3	17.4	17.5	17.6	17.7	17.8	59.1	59.2	59.3	59.4	61.1	61.2	87.1	87.2	89.1	89.2	89.3	90.1	90.2
Generation	p	p	p	p	p	p	p	p	p	p	p	p	p	p	p	p	p	p	p	p	p
SiO2	50.751	51.265	51.166	51.769	51.246	53.981	52.538	52.465	52.272	52.663	52.447	52.801	51.672	53.489	52.087	51.719	51.237	51.544	52.964	52.146	50.751
TiO2	0.266	0.194	0.202	0.212	0.148	0.118	0.239	0.232	0.178	0.208	0.246	0.126	0.223	0.152	0.177	0.207	0.216	0.2	0.176	0.082	0.165
Al2O3	2.558	2.47	2.41	2.287	2.655	1.439	2.594	2.228	2.386	2.328	2.41	1.989	2.616	1.291	1.945	1.91	2.589	2.261	2.235	1.695	2.429
Cr2O3	0.158	0.104	0.015	0.125	0.125	0.109	0.089	0.129	0.028	0	0.017	0.036	0.068	0.041	0.066	0.042	0.013	0.019	0.051	0.03	0
FeO	8.789	8.859	8.39	8.434	9	7.579	8.215	8.574	9.265	9.462	9.483	9.684	9.878	8.245	8.816	9.328	9.646	9.392	8.549	8.814	9.459
MnO	0.25	0.222	0.271	0.306	0.288	0.261	0.241	0.24	0.263	0.237	0.307	0.211	0.256	0.278	0.293	0.312	0.408	0.403	0.386	0.281	0.294
MgO	13.326	13.041	13.61	13.707	13.297	14.522	13.633	13.495	12.722	13.211	12.716	13.048	12.546	13.815	13.661	13.29	13.164	13.235	13.684	13.449	13.08
CaO	22.799	23.077	23.936	23.298	23.057	22.752	21.858	22.297	21.705	21.476	21.94	21.779	23.202	22.392	22.737	22.937	22.465	23.111	22.02	23.332	22.912
Na2O	0.505	0.513	0.519	0.442	0.463	0.301	0.426	0.446	0.538	0.513	0.587	0.467	0.657	0.471	0.665	0.549	0.515	0.506	0.38	0.391	0.571
K2O	0.02	0.005	0.015	0.004	0.003	0.016	0.007	0	0.001	0	0.004	0	0	0.017	0	0	0.111	0	0.021	0	0.001
Total	99.422	99.75	100.534	100.584	100.282	101.078	99.84	100.106	99.358	100.098	100.157	100.141	101.118	100.191	100.447	100.294	100.364	100.671	100.466	100.22	99.662
Oxygens	6	6	6	6	6	6	6	6	6	6	6	6	6	6	6	6	6	6	6	6	6
Si	1.898	1.914	1.888	1.912	1.902	1.979	1.954	1.95	1.963	1.962	1.956	1.969	1.909	1.985	1.926	1.921	1.903	1.908	1.961	1.938	1.896
Ti	0.008	0.005	0.006	0.006	0.004	0.003	0.007	0.006	0.005	0.006	0.007	0.004	0.006	0.004	0.005	0.006	0.006	0.006	0.005	0.002	0.005
Al	0.113	0.109	0.105	0.1	0.116	0.062	0.114	0.098	0.106	0.102	0.106	0.087	0.114	0.056	0.085	0.084	0.113	0.099	0.098	0.074	0.107
Cr	0.005	0.003	0.001	0.004	0.004	0.003	0.003	0.004	0.001	0	0.001	0.001	0.002	0.001	0.002	0.001	0	0.001	0.001	0.001	0
Fe3+	0.11	0.088	0.145	0.092	0.101	0	0	0.018	0	0	0.011	0	0.101	0	0.1	0.1	0.111	0.109	0	0.073	0.132
Fe2+	0.165	0.189	0.114	0.168	0.178	0.232	0.256	0.248	0.291	0.295	0.284	0.302	0.204	0.256	0.173	0.189	0.189	0.182	0.265	0.201	0.163
Mn	0.008	0.007	0.008	0.01	0.009	0.008	0.008	0.008	0.008	0.007	0.01	0.007	0.008	0.009	0.009	0.01	0.013	0.013	0.012	0.009	0.009
Mg	0.743	0.725	0.749	0.755	0.736	0.793	0.755	0.748	0.712	0.733	0.707	0.725	0.691	0.764	0.753	0.736	0.729	0.73	0.755	0.745	0.728
Ca	0.914	0.923	0.947	0.922	0.917	0.893	0.871	0.888	0.873	0.857	0.877	0.87	0.918	0.89	0.901	0.913	0.894	0.917	0.874	0.929	0.917
Na	0.037	0.037	0.037	0.032	0.033	0.021	0.031	0.032	0.039	0.037	0.042	0.034	0.047	0.034	0.048	0.04	0.037	0.036	0.027	0.028	0.041
K	0.001	0	0.001	0	0	0.001	0	0	0	0	0	0	0	0.001	0	0	0.005	0	0.001	0	0
Sum	4	4	4	4	4	3.997	3.997	4	3.998	4	4	4	4	4	4	4	4	4	3.999	4	4
Wo	47.102	47.772	48.228	47.357	47.235	46.358	46.088	46.494	46.34	45.284	46.401	45.699	47.757	46.375	46.541	46.855	46.199	46.993	45.84	47.474	47.021
En	38.316	37.554	38.149	38.771	37.906	41.168	39.984	39.163	37.777	38.749	37.431	38.099	35.945	39.828	38.9	37.769	37.648	37.46	39.625	38.082	37.353
Fs	14.582	14.674	13.623	13.872	14.859	12.475	13.927	14.342	15.883	15.967	16.168	16.202	16.298	13.796	14.559	15.375	16.153	15.547	14.535	14.444	15.626
Biotite
Spot no.	17.1	17.2	17.3	59.1	59.2	59.3	59.4	59.5	59.6	61.1	61.2	87.1	89.1	89.2	89.3	89.4	89.5	90.1	90.2
Generation	p	p	p	p	p	p	p	p	p	p	p	p	p	p	r	r	r	p	p
SiO2	36.752	37.518	37.914	36.57	37.645	37.892	38.777	38.145	37.522	38.441	38.238	37.513	38.521	37.559	37.634	38.142	38.437	36.993	36.731
TiO2	4.375	4.244	4.065	3.884	4.621	4.262	4.41	5.009	5.086	3.555	3.756	4.402	4.437	4.088	4.704	4.758	5.198	4.73	3.959
Al2O3	13.787	14.207	14	13.871	13.546	13.727	13.97	13.799	13.47	14.787	14.505	14.411	14.635	14.524	13.619	13.753	14.087	14.365	14.171
Cr2O3	0.237	0.247	0.27	0.027	0.142	0.056	0.075	0.098	0.11	0.033	0.052	0.108	0.031	0	0.01	0.063	0.045	0.012	0.051
FeO	14.162	14.156	14.833	14.484	13.753	12.874	13.986	13.261	15.219	15.125	13.518	17.875	15.518	15.589	13.313	14.729	14.222	15.696	14.716
MnO	0.074	0.079	0.092	0.043	0.027	0.037	0.06	0.034	0.041	0.01	0.055	0.221	0.081	0.107	0.064	0.051	0.068	0.082	0.048
MgO	14.248	14.685	14.766	14.799	14.876	15.263	15.215	14.956	13.892	15.299	15.974	12.535	14.133	14.435	14.504	14.39	14.35	13.918	14.76
CaO	0.042	0.117	0.146	-	0.203	0.138	0.111	0.085	0.155	0.05	0.029	0.111	0.017	0.027	0.047	0.141	0.049	0	0
Na2O	0.181	0.194	0.147	0.107	0.12	0.081	0.059	0.053	0.128	0.137	0.12	0.138	0.146	0.104	0.066	0.067	0.071	0.077	0.071
K2O	9.425	9.25	8.502	9.496	9.318	9.275	8.983	9.349	9.29	9.101	9.643	9.257	9.128	9.351	9.491	9.601	9.381	9.398	9.473
Total	93.283	94.697	94.735	93.281	94.251	93.605	95.646	94.789	94.913	96.538	95.89	96.571	96.647	95.784	93.452	95.695	95.908	95.271	93.98
Oxygens	11	11	11	11	11	11	11	11	11	11	11	11	11	11	11	11	11	11	11
Si	2.805	2.81	2.832	2.795	2.83	2.85	2.857	2.838	2.82	2.82	2.817	2.802	2.83	2.797	2.847	2.835	2.836	2.777	2.787
Ti	0.251	0.239	0.229	0.223	0.261	0.241	0.244	0.28	0.288	0.196	0.208	0.247	0.245	0.229	0.267	0.266	0.288	0.267	0.226
Al	1.241	1.255	1.233	1.25	1.201	1.218	1.213	1.21	1.194	1.279	1.26	1.269	1.268	1.275	1.215	1.205	1.225	1.272	1.267
Cr	0.014	0.015	0.016	0.002	0.008	0.004	0.005	0.006	0.007	0.002	0.003	0.006	0.002	0	0.001	0.004	0.003	0.001	0.003
Fe3+	0	0	0	0	0	0	0	0	0	0.006	0	0	0	0	0	0	0	0	0
Fe2+	0.904	0.887	0.927	0.926	0.864	0.81	0.862	0.825	0.957	0.923	0.833	1.117	0.954	0.971	0.842	0.916	0.877	0.986	0.934
Mn	0.005	0.005	0.006	0.003	0.002	0.003	0.004	0.002	0.003	0.001	0.004	0.014	0.005	0.007	0.004	0.003	0.004	0.005	0.003
Mg	1.621	1.64	1.644	1.686	1.667	1.711	1.671	1.658	1.556	1.673	1.753	1.396	1.547	1.603	1.635	1.594	1.578	1.557	1.669
Ca	0.003	0.01	0.012	0	0.016	0.011	0.009	0.007	0.013	0.004	0.002	0.009	0.002	0.002	0.004	0.011	0.004	0	0
Na	0.027	0.028	0.022	0.016	0.017	0.012	0.009	0.007	0.019	0.02	0.017	0.02	0.021	0.014	0.01	0.01	0.01	0.012	0.01
K	0.918	0.884	0.81	0.926	0.894	0.891	0.844	0.887	0.891	0.852	0.906	0.883	0.856	0.888	0.916	0.91	0.883	0.9	0.917
Sum	7.789	7.772	7.731	7.828	7.761	7.75	7.717	7.722	7.747	7.777	7.805	7.765	7.729	7.788	7.742	7.755	7.709	7.777	7.816
Hornblende
Spot no.	17.1	17.2	17.3	17.4	17.5	17.6	17.7	17.8	17.9	17.1	17.11	17.12	17.13	17.14	17.15	59.1	59#	59.2	59.3	59.4
Generation	p	r	p	p	r	r	pro	p	p	r	r	r	pro	r？	r	p	p	r	r	r
SiO2	47.96	45.946	46.755	45.544	50.967	48.433	49.24	46.911	43.622	53.237	51.771	48.668	48.347	47.854	46.861	41.133	40.2461	44.103	49.958	51.088
TiO2	0.502	0.82	0.806	1.039	0.45	0.705	0.623	1.134	1.645	0.183	0.357	0.557	0.742	0.821	0.941	1.609	1.74626	1.798	0.845	0.026
Al2O3	7.623	9.104	8.589	10.228	5.644	8.039	7.588	9.124	11.092	4.045	4.64	7.179	8.362	8.106	8.537	10.984	14.2869	10.084	6.031	2.685
Cr2O3	0.138	0.194	0.146	0.121	0.092	0.169	0.232	0.207	0.213	0.001	0.125	0.138	0.233	0.219	0.2	0.043	0	0.047	0.003	0.044
FeO	12.628	12.975	13.065	13.246	10.937	11.8	10.815	12.532	13.305	9.207	10.445	11.573	10.883	12.563	12.74	15.337	18.6587	13.709	11.92	15.424
MnO	0.187	0.138	0.146	0.169	0.115	0.184	0.179	0.173	0.106	0.219	0.208	0.154	0.185	0.15	0.122	0.127	0	0.073	0.155	0.255
MgO	14.894	14.463	14.391	13.441	16.328	14.836	15.906	14.117	12.646	17.849	16.16	14.658	15.136	14.174	13.852	11.158	11.6742	12.68	15.606	14.129
CaO	11.886	12.013	12.465	12.171	11.576	11.97	11.628	11.556	11.55	11.887	11.936	11.724	11.733	11.776	11.746	11.664	8.91333	11.797	11.463	10.432
Na2O	1.07	1.305	1.154	1.374	0.697	0.963	0.938	1.21	1.501	0.483	0.623	0.854	1.075	1.028	0.981	1.392	2.2784	1.192	0.607	0.126
K2O	0.501	0.67	0.649	0.821	0.391	0.606	0.509	0.8	1.111	0.228	0.361	0.535	0.648	0.672	0.714	1.637	0.422485	1.422	0.642	0.05
Total	97.389	97.628	98.166	98.154	97.197	97.705	97.658	97.764	96.791	97.339	96.626	96.04	97.344	97.363	96.694	95.084	98.2263	96.905	97.23	94.259
Oxygens	23	23	23	23	23	23	23	23	23	23	23	23	23	23	23	23	23	23	23	23
Si	6.94	6.671	6.762	6.622	7.3	6.978	7.032	6.797	6.469	7.541	7.456	7.12	6.966	6.955	6.868	6.317	5.906	6.558	7.209	7.679
Ti	0.054	0.09	0.088	0.114	0.048	0.077	0.067	0.123	0.184	0.019	0.039	0.062	0.08	0.09	0.104	0.186	0.193	0.201	0.092	0.003
Al	1.3	1.557	1.464	1.754	0.952	1.366	1.278	1.558	1.939	0.676	0.788	1.238	1.42	1.39	1.476	1.988	2.472	1.767	1.026	0.477
Cr	0.016	0.022	0.017	0.014	0.01	0.019	0.026	0.024	0.025	0	0.015	0.016	0.026	0.025	0.023	0.005	0	0.006	0	0.005
Fe3+	0.47	0.548	0.449	0.333	0.28	0.286	0.38	0.318	0.267	0.177	0.18	0.233	0.267	0.262	0.312	0.352	0.972	0.224	0.256	0.143
Fe2+	1.059	1.028	1.132	1.278	1.031	1.136	0.913	1.201	1.384	0.914	1.079	1.183	1.044	1.265	1.25	1.618	1.318	1.481	1.183	1.795
Mn	0.023	0.017	0.018	0.021	0.015	0.022	0.022	0.021	0.014	0.026	0.026	0.019	0.023	0.018	0.015	0.017	0	0.009	0.02	0.033
Mg	3.211	3.129	3.101	2.913	3.485	3.187	3.386	3.049	2.796	3.768	3.469	3.196	3.251	3.07	3.025	2.554	2.552	2.81	3.357	3.165
Ca	1.844	1.868	1.932	1.896	1.777	1.848	1.78	1.795	1.835	1.805	1.843	1.837	1.811	1.835	1.845	1.919	1.401	1.88	1.772	1.68
Na	0.3	0.369	0.322	0.386	0.194	0.268	0.26	0.34	0.431	0.132	0.173	0.241	0.302	0.29	0.279	0.414	0.649	0.343	0.171	0.038
K	0.092	0.124	0.12	0.152	0.071	0.112	0.093	0.148	0.21	0.042	0.066	0.101	0.119	0.124	0.133	0.321	0.079	0.269	0.118	0.01
Sum	15.467	15.608	15.558	15.596	15.256	15.395	15.363	15.481	15.644	15.158	15.193	15.323	15.398	15.412	15.433	15.813	15.542	15.625	15.287	15.075
Hornblende
Spot no.	61.1	61.2	61.3	61.4	61.5	87.1	89.1	89.2	89.3	89.4	89.5	89.6	89.7	89.8	89.9	90.1	90.2
Generation	p	p	p	p	p	p	r	r	p	r	p	r	r	r	r	p	p
SiO2	42.197	43.214	43.89	43.014	42.389	44.3	42.626	51.984	42.015	52.526	42.644	54.022	52.199	54.656	47.463	42.206	42.187
TiO2	1.393	1.644	1.81	1.891	2.203	1.523	0.811	0.128	1.543	0.572	2.057	0.118	0.611	0.324	0.89	1.857	1.684
Al2O3	11.59	11.24	10.125	11.002	10.915	10.238	11.622	4.526	11.525	4.769	10.972	3.035	4.821	2.961	5.809	11.399	11.594
Cr2O3	0.068	0.048	0.013	0.066	0.03	0.146	0.01	0.013	0	0.028	0.026	0.025	0.028	0.014	0.054	0.052	0.062
FeO	15.044	15.184	13.979	15.462	14.825	14.208	16.002	11.302	16.114	10.515	15.055	9.731	10.449	9.505	10.622	15.668	15.63
MnO	0.117	0.137	0.14	0.166	0.129	0.16	0.19	0.234	0.172	0.261	0.236	0.256	0.286	0.223	0.193	0.201	0.17
MgO	11.752	11.82	12.255	11.4	11.269	12.836	11.902	17.092	11.24	16.857	11.316	17.939	16.556	18.235	14.26	11.73	11.311
CaO	12.157	12.477	11.579	11.392	11.628	12.154	12.375	12.025	12.076	11.557	11.361	11.343	11.831	11.637	11.72	11.834	12.191
Na2O	1.351	1.418	1.21	1.68	1.433	1.325	1.357	0.556	1.544	0.613	1.446	0.357	0.629	0.344	0.684	1.517	1.508
K2O	1.43	1.459	1.408	1.703	1.604	1.167	1.275	0.27	1.621	0.327	1.66	0.169	0.349	0.196	0.487	1.57	1.633
Total	97.099	98.641	96.409	97.776	96.425	98.057	98.17	98.13	97.85	98.025	96.773	96.995	97.759	98.095	92.182	98.034	97.97
Oxygens	23	23	23	23	23	23	23	23	23	23	23	23	23	23	23	23	23
Si	6.306	6.377	6.568	6.419	6.41	6.507	6.291	7.358	6.283	7.441	6.416	7.685	7.423	7.686	7.244	6.273	6.298
Ti	0.156	0.182	0.204	0.212	0.25	0.168	0.09	0.014	0.173	0.061	0.233	0.013	0.065	0.034	0.102	0.208	0.189
Al	2.042	1.956	1.787	1.935	1.947	1.773	2.022	0.756	2.033	0.797	1.946	0.51	0.808	0.491	1.046	1.997	2.04
Cr	0.008	0.006	0.001	0.008	0.004	0.017	0.001	0.001	0	0.003	0.004	0.003	0.003	0.001	0.006	0.006	0.007
Fe3+	0.417	0.266	0.214	0.217	0.148	0.356	0.63	0.45	0.368	0.184	0.221	0.096	0.194	0.076	0.08	0.424	0.285
Fe2+	1.462	1.607	1.536	1.713	1.727	1.389	1.345	0.887	1.647	1.062	1.674	1.061	1.049	1.042	1.276	1.523	1.667
Mn	0.015	0.018	0.018	0.021	0.017	0.02	0.024	0.028	0.022	0.031	0.031	0.031	0.035	0.026	0.025	0.025	0.021
Mg	2.617	2.6	2.734	2.536	2.54	2.811	2.617	3.605	2.505	3.559	2.539	3.804	3.51	3.822	3.244	2.598	2.516
Ca	1.947	1.974	1.857	1.821	1.884	1.912	1.958	1.825	1.935	1.755	1.832	1.729	1.803	1.754	1.917	1.884	1.95
Na	0.391	0.406	0.351	0.486	0.419	0.379	0.389	0.154	0.447	0.168	0.423	0.099	0.174	0.093	0.201	0.438	0.437
K	0.273	0.275	0.269	0.324	0.309	0.219	0.241	0.049	0.309	0.06	0.319	0.031	0.064	0.036	0.095	0.298	0.31
Sum	15.779	15.759	15.611	15.768	15.705	15.673	15.824	15.276	15.848	15.181	15.712	15.094	15.191	15.086	15.263	15.82	15.819
Plagioclase
Spot no.	17.1	17.2	17.3	17.4	17.5	17.6	17.7	17.8	17.9	59.1	59.2	59.3	59.4	59.5	59.6	59.7	59#
Generation	p	p	p	p	p	p	r	r	pro	p	p	p	p	p	p	p	p
SiO2	55.67	55.943	55.263	55.421	57.255	56.672	56.454	56.296	55.682	60.629	59.759	61.114	60.525	60.139	60.414	60.006	59.7743
TiO2	0.08	0.036	0.059	0	0	0	0	0.007	0.022	0.022	0.015	0	0.013	0.04	0	0.015	0
Al2O3	27.989	28.472	28.331	28.431	27.623	27.375	27.959	27.299	27.735	25.214	25.406	24.557	24.969	24.811	25.189	24.848	25.2492
Cr2O3	0	0	0	0	0.013	0.012	0	0.032	0.002	0	0.001	0.001	0.001	0.001	0.015	0.001	0
FeO	0.139	0.147	0.241	0.121	0.109	0.11	0.284	0.139	0.589	0.131	0.053	0.07	0.151	0.165	0.077	0.158	0
MnO	0.023	0.014	0.005	0	0	0.003	0	0.025	0.008	0	0	0.011	0	0	0	0.034	0
MgO	0.005	0	0	0	0	0.012	0	0.016	0.025	0.003	0.009	0.026	0.014	0.037	0	0.018	0
CaO	9.855	10.009	10.25	10.233	9.774	9.839	10.123	9.713	10.014	6.785	6.682	6.862	7.066	7.032	6.911	6.648	6.86564
Na2O	5.583	5.565	5.567	5.26	5.764	5.502	5.331	5.508	5.351	7.097	6.982	7.121	6.522	6.929	7.115	6.9	7.03749
K2O	0.276	0.281	0.258	0.301	0.243	0.24	0.279	0.264	0.318	0.384	0.846	0.276	0.442	0.527	0.481	0.511	1.07334
Total	99.62	100.467	99.974	99.767	100.781	99.765	100.43	99.299	99.746	100.265	99.753	100.037	99.702	99.68	100.202	99.138	100
Oxygens	8	8	8	8	8	8	8	8	8	8	8	8	8	8	8	8	8
Si	2.512	2.503	2.49	2.497	2.549	2.548	2.524	2.544	2.512	2.688	2.671	2.713	2.696	2.687	2.684	2.691	2.67
Ti	0.003	0.001	0.002	0	0	0	0	0	0.001	0.001	0.001	0	0	0.001	0	0.001	0
Al	1.489	1.502	1.505	1.51	1.45	1.451	1.474	1.454	1.475	1.318	1.339	1.285	1.311	1.307	1.319	1.314	1.33
Cr	0	0	0	0	0	0	0	0.001	0	0	0	0	0	0	0	0	0
Fe3+	0.005	0.006	0.009	0.005	0.004	0.004	0.011	0.005	0.022	0.005	0.002	0.003	0.006	0.006	0.003	0.006	0
Fe2+	0	0	0	0	0	0	0	0	0	0	0	0	0	0	0	0	0
Mn	0.001	0.001	0	0	0	0	0	0.001	0	0	0	0	0	0	0	0.001	0
Mg	0	0	0	0	0	0.001	0	0.001	0.002	0	0.001	0.002	0.001	0.002	0	0.001	0
Ca	0.476	0.48	0.495	0.494	0.466	0.474	0.485	0.47	0.484	0.322	0.32	0.326	0.337	0.337	0.329	0.319	0.329
Na	0.488	0.483	0.486	0.46	0.497	0.48	0.462	0.483	0.468	0.61	0.605	0.613	0.563	0.6	0.613	0.6	0.61
K	0.016	0.016	0.015	0.017	0.014	0.014	0.016	0.015	0.018	0.022	0.048	0.016	0.025	0.03	0.027	0.029	0.061
Sum	4.991	4.991	5.002	4.984	4.98	4.971	4.972	4.975	4.982	4.966	4.987	4.958	4.939	4.97	4.975	4.962	5
Ab	49.8	49.4	48.8	47.3	50.9	49.6	48	49.9	48.2	63.9	62.1788	64.1885	60.8649	62.0476	63.2611	63.2911	61
An	48.6	49	49.6	50.9	47.7	49	50.4	48.6	49.9	33.8	32.888	34.1361	36.4324	34.8501	33.9525	33.6498	32.9
Or	1.6	1.6	1.5	1.8	1.4	1.4	1.7	1.5	1.9	2.3	4.9332	1.67539	2.7027	3.10238	2.78638	3.05907	6.1
Plagioclase
Spot no.	61.1	61.2	61.3	87.1	89.1	89.2	89.3	89.4	90.1	90.2
Generation	p	p	p	p	p	p	r	r	p	p
SiO2	59.517	60.454	59.279	61.777	60.247	60.729	60.477	60.979	59.392	60.062
TiO2	0.005	0.038	0.009	0.062	0	0	0.03	0.026	0.028	0.059
Al2O3	25.646	26.136	25.147	26.003	25.71	25.952	25.385	25.284	25.567	25.717
Cr2O3	0.032	0.022	0.002	0	0	0	0.005	0.022	0	0.032
FeO	0.097	0.076	0.388	0.126	0.128	0.138	0.136	0.402	0.103	0.125
MnO	0	0	0.008	0	0	0	0.029	0.018	0	0
MgO	0.025	0.022	0.026	0.019	0	0.002	0.006	0	0	0.014
CaO	7.338	7.277	7.371	7.172	7.123	7.198	7.126	6.725	7.009	7.053
Na2O	6.9	6.962	6.54	6.486	6.921	7.034	7.031	7.177	7.102	6.787
K2O	0.459	0.446	0.384	0.27	0.423	0.406	0.353	0.261	0.435	0.413
Total	100.019	101.433	99.154	101.915	100.552	101.459	100.578	100.894	99.636	100.262
Oxygens	8	8	8	8	8	8	8	8	8	8
Si	2.654	2.655	2.663	2.687	2.667	2.665	2.676	2.687	2.657	2.665
Ti	0	0.001	0	0.002	0	0	0.001	0.001	0.001	0.002
Al	1.348	1.353	1.332	1.333	1.342	1.343	1.324	1.313	1.348	1.345
Cr	0.001	0.001	0	0	0	0	0	0.001	0	0.001
Fe3+	0.004	0.003	0.015	0.005	0.005	0.005	0.005	0.015	0.004	0.005
Fe2+	0	0	0	0	0	0	0	0	0	0
Mn	0	0	0	0	0	0	0.001	0.001	0	0
Mg	0.002	0.001	0.002	0.001	0	0	0	0	0	0.001
Ca	0.351	0.342	0.355	0.334	0.338	0.338	0.338	0.317	0.336	0.335
Na	0.597	0.593	0.57	0.547	0.594	0.598	0.603	0.613	0.616	0.584
K	0.026	0.025	0.022	0.015	0.024	0.023	0.02	0.015	0.025	0.023
Sum	4.981	4.974	4.959	4.924	4.969	4.972	4.97	4.962	4.987	4.961
Ab	61.3	61.7	60.2	61.1	62.2	62.3	62.8	64.9	63.1	62
An	36	35.7	37.5	37.3	35.3	35.3	35.2	33.6	34.4	35.6
Or	2.7	2.6	2.3	1.7	2.5	2.4	2.1	1.6	2.6	2.5
Chlorite
Spot no.	59.1	61.1	61.2	89.1	90.1	90.2
Generation	r	r	r	r	r	r
SiO2	30.343	34.874	31.065	31.195	33.231	32.213
TiO2	0.035	0.056	0.067	0.002	0.057	0.073
Al2O3	12.032	11.6	15.232	15.068	14.111	16.236
Cr2O3	0.068	0	0	0.056	0.075	0.02
FeO	24.051	21.376	24.699	21.358	22.179	22.6
MnO	0.203	0.162	0.187	0.254	0.227	0.19
MgO	14.177	17.576	18.205	18.317	19.12	18.37
CaO	1.932	2.229	0.338	0.377	1.229	0.629
Na2O	0.07	0.102	0.046	0.067	0.004	0.071
K2O	0.115	0.07	0.02	0.054	0.036	0.048
Total	83.026	88.045	89.859	86.748	90.269	90.45
Oxygens	14	14	14	14	14	14
Si	3.378	3.561	3.162	3.235	3.319	3.21
Ti	0.003	0.005	0.005	0	0.005	0.005
Al	1.579	1.397	1.827	1.842	1.661	1.908
Cr	0.006	0	0	0.005	0.006	0.002
Fe3+	0	0	0	0	0	0
Fe2+	2.24	1.826	2.102	1.852	1.853	1.884
Mn	0.019	0.014	0.016	0.022	0.019	0.016
Mg	2.353	2.676	2.762	2.831	2.846	2.728
Ca	0.23	0.244	0.037	0.042	0.132	0.067
Na	0.015	0.02	0.01	0.014	0	0.014
K	0.017	0.009	0.003	0.007	0.005	0.006
Sum	9.842	9.751	9.925	9.851	9.845	9.84
*The integer part of spot no represents the sample number which omit the prefix 16ALT for concise, the decimal part represents the analytical number for the mineral. For example, 17.1 means the first anlylized point for sample 16ALT17.
†The mineral generation abbreviation: pro for prograde, p for peak, r for retrograde
§N.D. = not determined.
#Calculated mineral composition by THERMOCALC
